# Supplementary material for: PD-1-cis IL-2R agonism yields better effectors from stem-like CD8+ T cells
Source: PubMed Central journal article supplement (PMC9534752; doi:10.1038/s41586-022-05192-0), 2022-09-28
Supplement: 41586_2022_5192_MOESM1_ESM.pdf [file 41586_2022_5192_MOESM1_ESM.pdf]

---

**Supplementary information**

---

**PD-1-*cis* IL-2R agonism yields better effectors  
from stem-like CD8 T cells**

---

In the format provided by the  
authors and unedited

## Cell Sorting

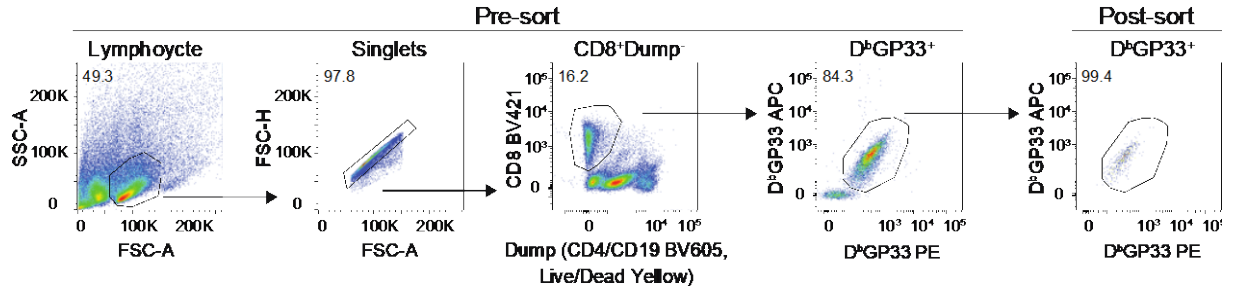

**Supplementary Figure 1. Gating strategy for sorting D<sup>b</sup>GP33<sup>+</sup> CD8<sup>+</sup> T cells in Fig. 2c and Extended Data Fig. 5g, h.** Splenocytes isolated from chronically LCMV-infected mice were gated on lymphocytes, singlets, live CD8<sup>+</sup> T cells, and D<sup>b</sup>GP33<sup>+</sup> CD8<sup>+</sup> T cells were sorted.

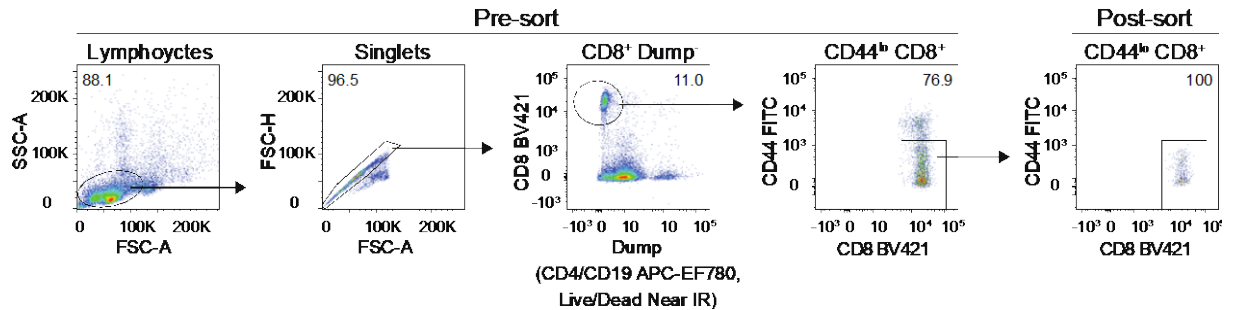

**Supplementary Figure 2. Gating strategy for sorting naive CD8<sup>+</sup> T cells in Fig. 2c.** Splenocytes isolated from uninfected C57BL6/J mice were gated on lymphocytes, singlets, live CD8<sup>+</sup> T cells, and CD44<sup>lo</sup> CD8<sup>+</sup> T cells were sorted. EF, eFluor.

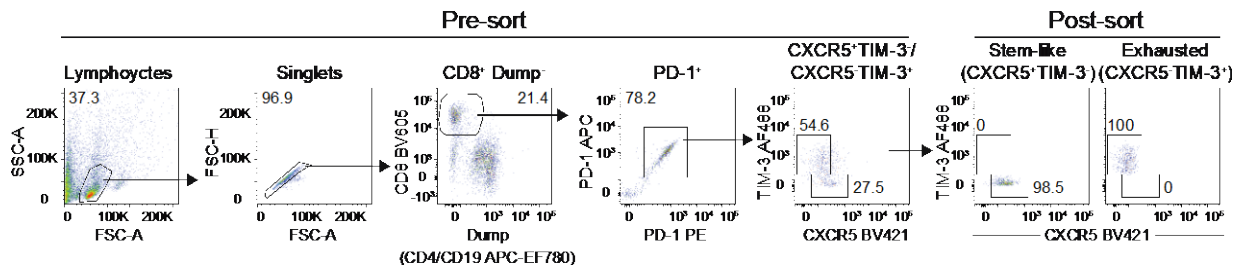

**Supplementary Figure 3. Gating strategy for sorting two PD-1<sup>+</sup> CD8<sup>+</sup> T-cell subsets in Fig. 2f-h and Extended Data Fig. 6f, g.** Splenocytes isolated from chronically LCMV-infected mice were gated on lymphocytes, singlets, CD8<sup>+</sup> T cells, PD-1<sup>+</sup> CD8<sup>+</sup> T cells, and PD-1<sup>+</sup>CXCR5<sup>+</sup>TIM-3<sup>-</sup> and PD-1<sup>+</sup>CXCR5<sup>-</sup>TIM-3<sup>+</sup> CD8<sup>+</sup> T cells were sorted. EF, eFluor; AF, Alexa Fluor.

## T cell analysis on CD8<sup>+</sup> T cells

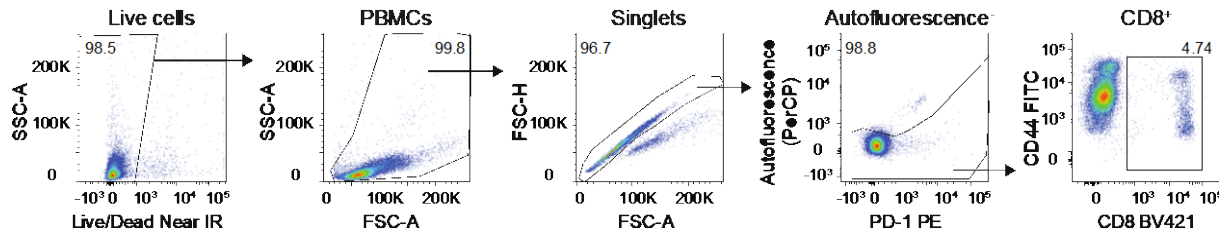

**Supplementary Figure 4. Gating strategy for CD8<sup>+</sup> T cells in Extended Data Fig. 2b-e.** PBMCs isolated from chronically LCMV-infected mice were gated on live PBMCs, singlets, autofluorescence<sup>-</sup> cells, and CD8<sup>+</sup> T cells.

## T cell analysis on LCMV-specific CD8<sup>+</sup> T cells

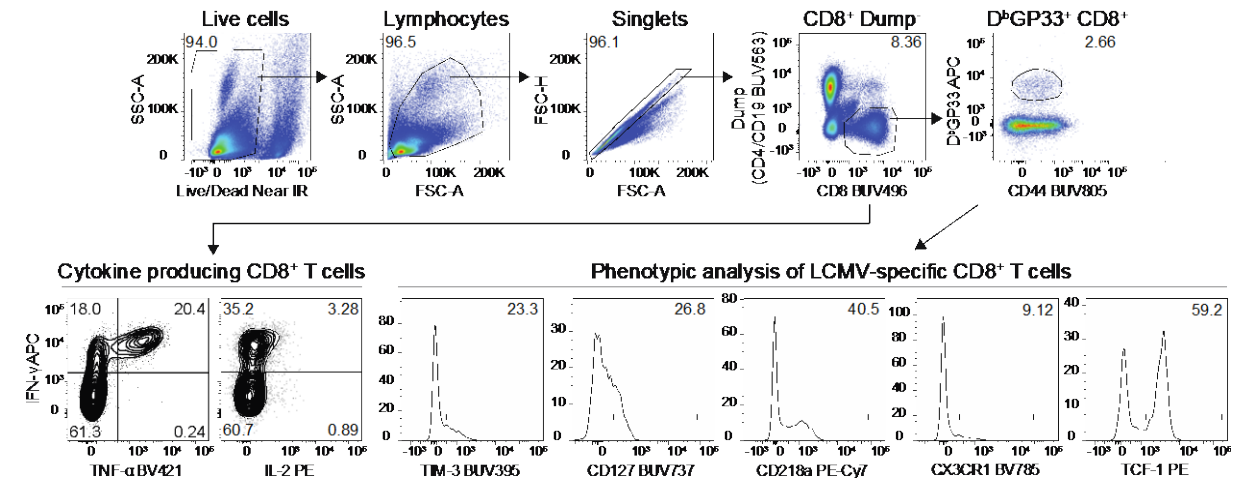

**Supplementary Figure 5. Gating strategy for LCMV-specific CD8<sup>+</sup> T cells in Fig. 2a, b, d, and Extended Data Fig. 6a, b, d, e.** Cells isolated from various tissues in chronically LCMV-infected mice were gated on live cells, lymphocytes, singlets, CD8<sup>+</sup> T cells, and LCMV-specific D<sup>b</sup>GP33<sup>+</sup> CD8<sup>+</sup> T cells were identified. Cytokine producing LCMV-specific CD8<sup>+</sup> T cells and LCMV-specific tetramer<sup>+</sup> CD8<sup>+</sup> T cells were analyzed.

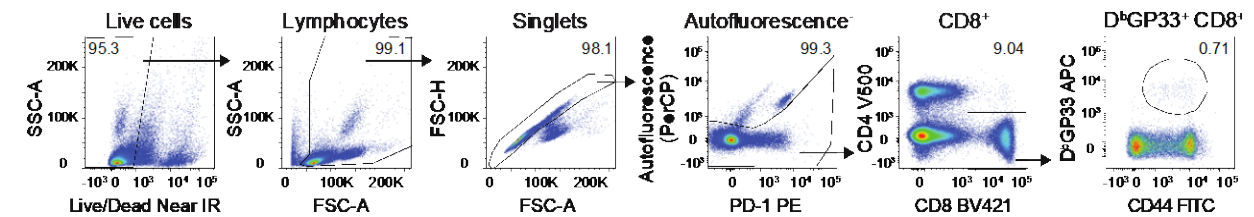

**Supplementary Figure 6. Gating strategy for LCMV-specific CD8<sup>+</sup> T cells in Extended Data Fig. 5c, d.** Cells isolated from various tissues in chronically LCMV-infected mice were gated on live cells, lymphocytes, singlets, autofluorescence<sup>-</sup> cells, CD8<sup>+</sup> T cells, and LCMV-specific D<sup>b</sup>GP33<sup>+</sup> CD8<sup>+</sup> T cells were analyzed.

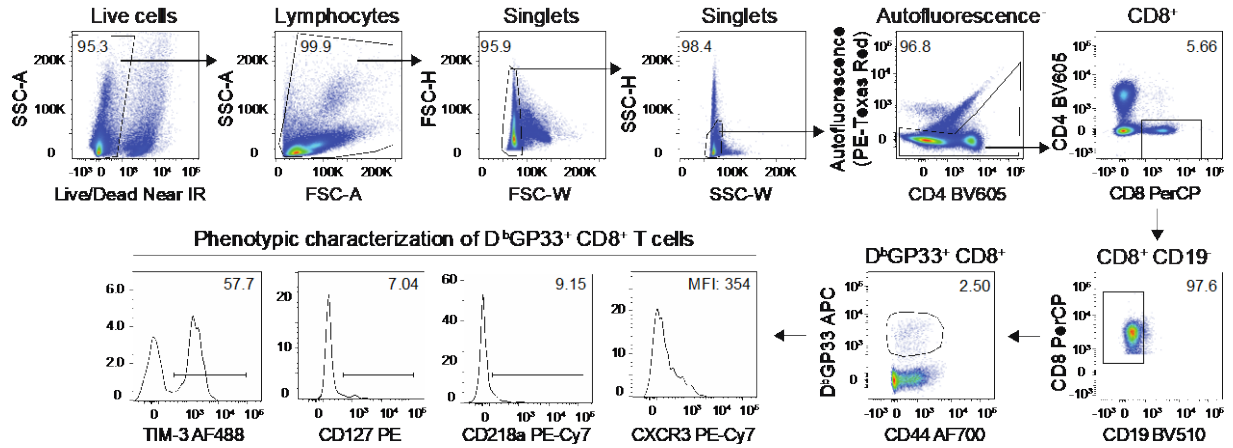

**Supplementary Figure 7. Gating strategy for LCMV-specific CD8<sup>+</sup> T cells in Extended Data Fig. 1b-d and Extended Data Fig. 5f.** Cells isolated from various tissues in chronically LCMV-infected mice were gated on live cells, lymphocytes, singlets, autofluorescence<sup>-</sup> cells, CD8<sup>+</sup> T cells, CD19<sup>-</sup> CD8<sup>+</sup> T cells, and LCMV-specific D<sup>b</sup>GP33<sup>+</sup> CD8<sup>+</sup> T cells were analyzed. AF, Alexa Fluor.

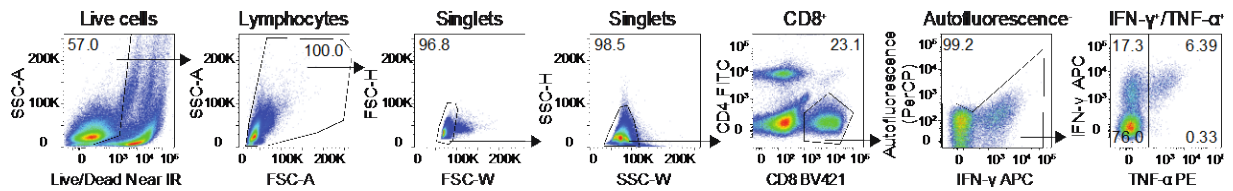

**Supplementary Figure 8. Gating strategy for cytokine producing CD8<sup>+</sup> T cells in Extended Data Fig. 1e, f and Extended Data Fig. 5e.** Splenocytes isolated from chronically LCMV-infected mice were gated on live cells, lymphocytes, singlets, CD8<sup>+</sup> T cells, autofluorescence<sup>-</sup> cells, and cytokine producing LCMV-specific CD8<sup>+</sup> T cells were analyzed.

T cell analysis on D<sup>b</sup>GP33<sup>+</sup> CD8<sup>+</sup> T cells, Foxp3<sup>+</sup> CD4<sup>+</sup> T cells, Foxp3<sup>-</sup> CD4<sup>+</sup> T cells, and naive CD8<sup>+</sup> T cells

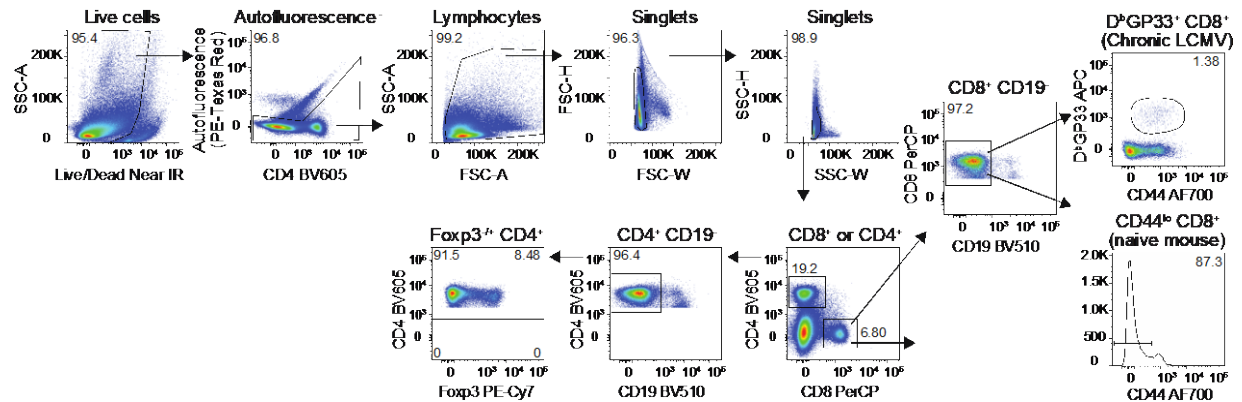

**Supplementary Figure 9. Gating strategy for comparing PD-1 expression on D<sup>b</sup>GP33<sup>+</sup> CD8<sup>+</sup> T cells, Foxp3<sup>+</sup> CD4<sup>+</sup> T cells, Foxp3<sup>-</sup> CD4<sup>+</sup> T cells, and naive CD8<sup>+</sup> T cells in Extended Data Fig. 5a.** Splenocytes isolated from chronically LCMV-infected mice or uninfected C57BL/6J mice were gated on live cells, autofluorescence<sup>-</sup> cells, lymphocytes, and CD8<sup>+</sup> and CD4<sup>+</sup> T cells were identified. For CD8<sup>+</sup> T cells, D<sup>b</sup>GP33<sup>+</sup> CD8<sup>+</sup> T cells in chronically LCMV-infected mice and CD44<sup>lo</sup> CD8<sup>+</sup> T cells in uninfected C57BL/6J mice were included in the analysis. For CD4<sup>+</sup> T cells, Foxp3<sup>+</sup> CD4<sup>+</sup> and Foxp3<sup>-</sup> CD4<sup>+</sup> T cells were analyzed. AF, Alexa Fluor.

## T cell analysis on donor CD45.2<sup>+</sup> CD8<sup>+</sup> T cells in adoptive transfer experiments

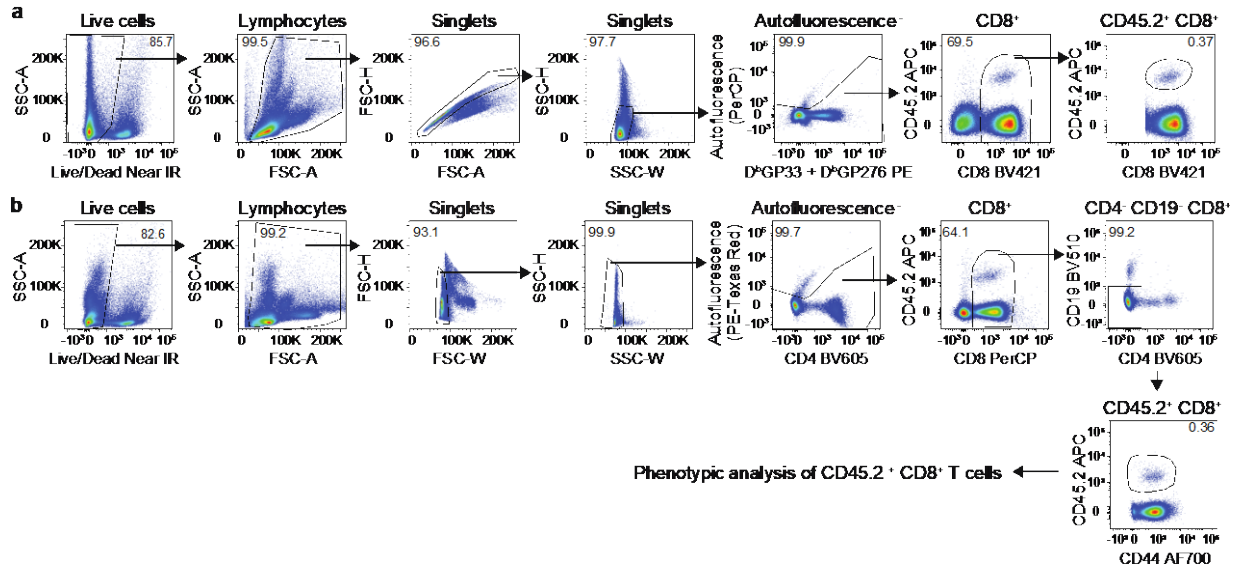

**Supplementary Figure 10. Gating strategy for donor CD45.2<sup>+</sup> CD8<sup>+</sup> T cells in Fig. 2g, h and Extended Data Fig. 6f, g.** Cells isolated from various tissues in chronically LCMV-infected recipient mice (CD45.1<sup>+</sup>) were gated on live cells, lymphocytes, singlets, autofluorescence<sup>-</sup> cells, CD8<sup>+</sup> T cells, and donor CD45.2<sup>+</sup> CD8<sup>+</sup> T cells were analyzed for their frequency (**a**) and phenotypic marker expression (**b**). AF, Alexa Fluor.

## T cell analysis on STAT5 phosphorylation and cis-trans assay

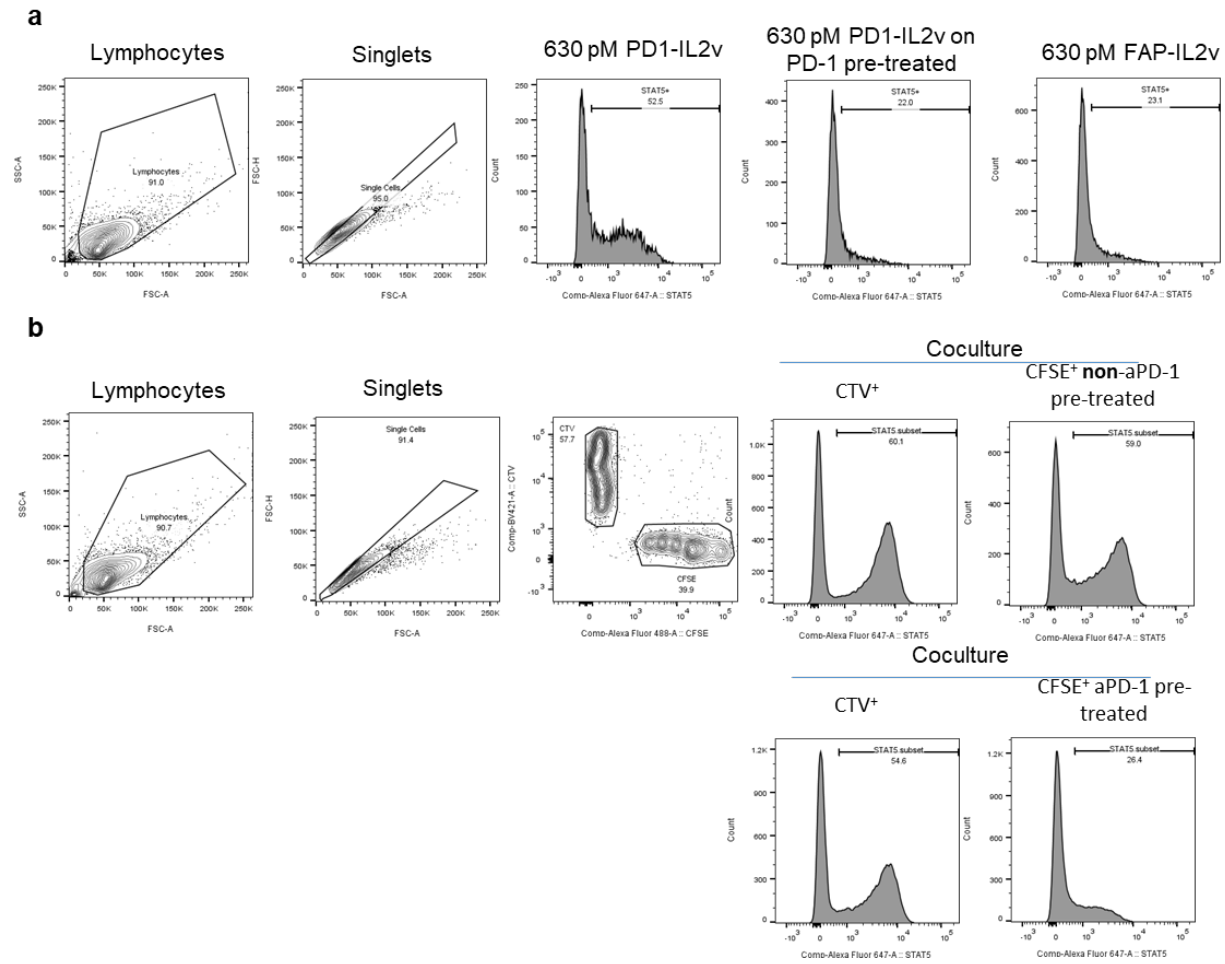

**Supplementary Figure 11. Gating strategy for Fig. 1a and b.** Sorted 3 days activated PD-1<sup>+</sup> CD4 T cells from healthy donors were gated on lymphocytes, singlets, positivity for CFSE or CTV and measured for the frequency of STAT-5P<sup>+</sup> (a) and (b).



## T cell analysis on binding competition on Tregs and Tconv

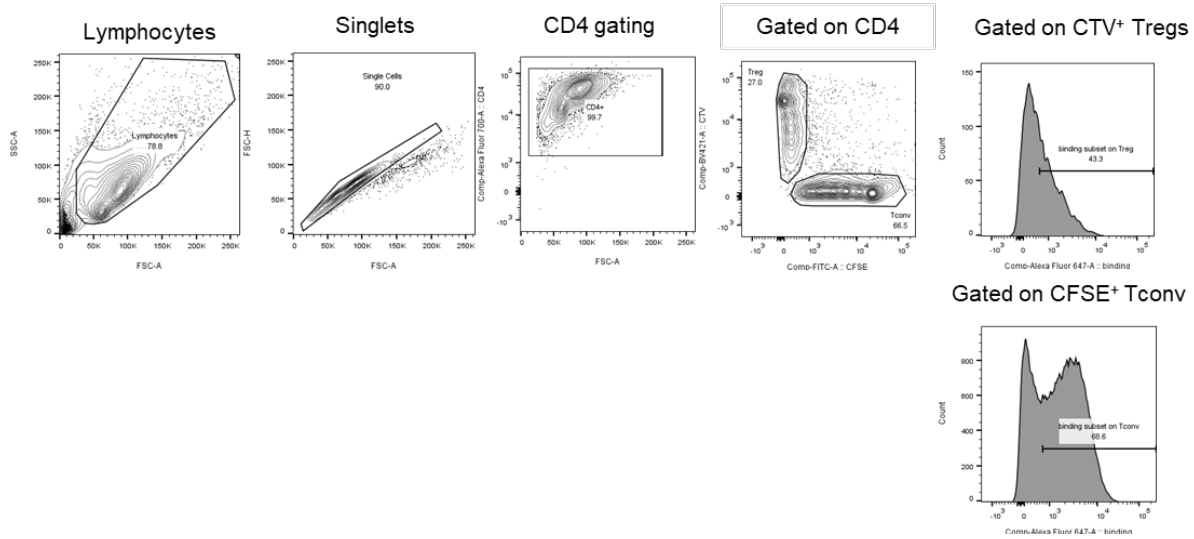

**Supplementary Figure 12. Gating strategy for Fig. 1c.** Sorted 3 days activated and cocultured Tregs and Tconv from healthy donors were gated on lymphocytes, singlets, CD4<sup>+</sup>, CFSE<sup>+</sup> or CTV<sup>+</sup> and measured for the frequency of PGLALA<sup>+</sup>.

## T cell analysis on PD-1 and IL-2R $\beta$ frequencies and quantification

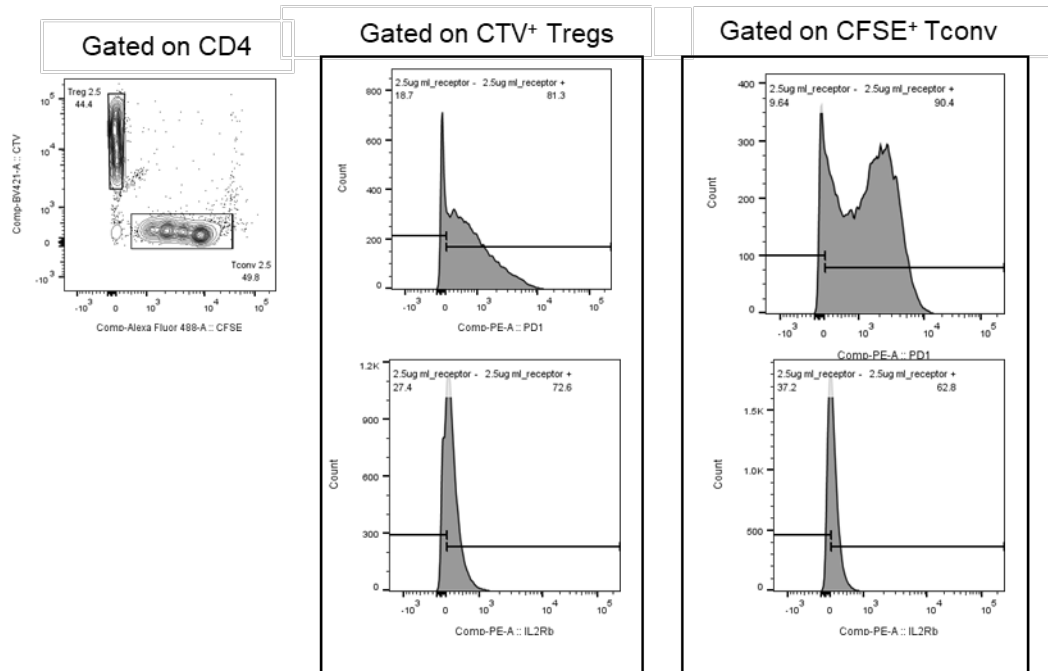

**Supplementary Figure 13. Gating strategy for Fig. 1d.** Sorted 3 days activated and cocultured Tregs and Tconv from healthy donors were gated on lymphocytes, singlets, CD4<sup>+</sup>, CFSE<sup>+</sup> or CTV<sup>+</sup> and measured for the frequency and density of PD-1<sup>+</sup> and IL-2R $\beta$ <sup>+</sup>.

# T cell analysis on Treg suppression

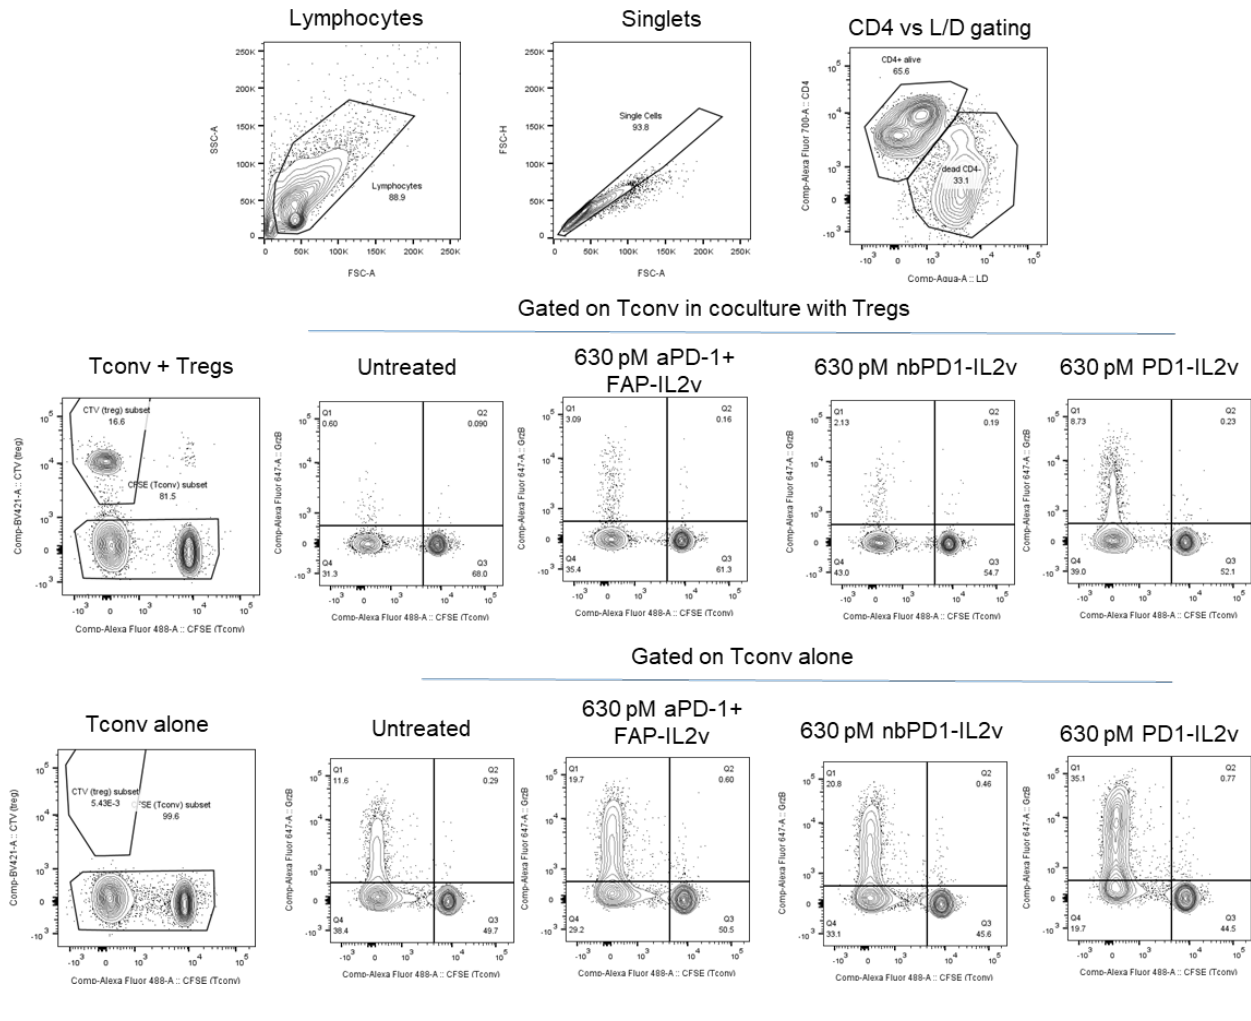

**Supplementary Figure 14. Gating strategy for Fig. 1e.** Sorted Tregs and Tconv from healthy donors after 5 days coculture were gated on lymphocytes, singlets, live, CD4<sup>+</sup>, CFSE<sup>+</sup> and measured for the frequency of granzyme B<sup>+</sup>.

## T cell analysis on GM-CSF, Granzyme B and IFN- $\gamma$ measurement

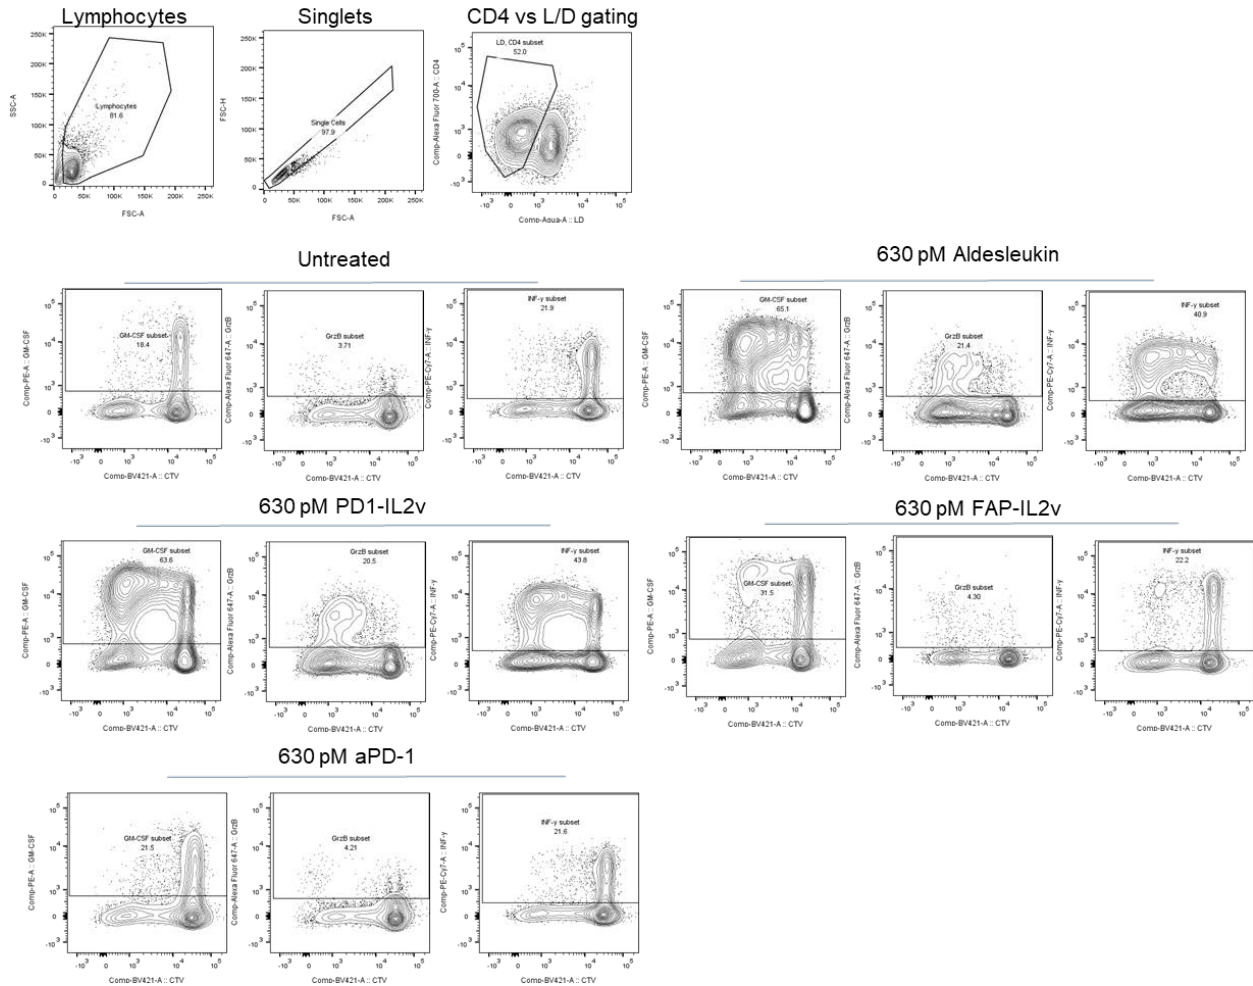

**Supplementary Figure 15. Gating strategy for Fig. 1f and EDF4a.** Sorted CD4 T cells from healthy donors after 5 days culture were gated on lymphocytes, singlets, live, CD4<sup>+</sup>, CFSE<sup>+</sup> and measured for the frequency of GM-CSF<sup>+</sup>, granzyme B<sup>+</sup> and IFN- $\gamma$ <sup>+</sup>.

## T cell analysis on CD8:CD4 T cell ratio and differentiation state in tumor and blood

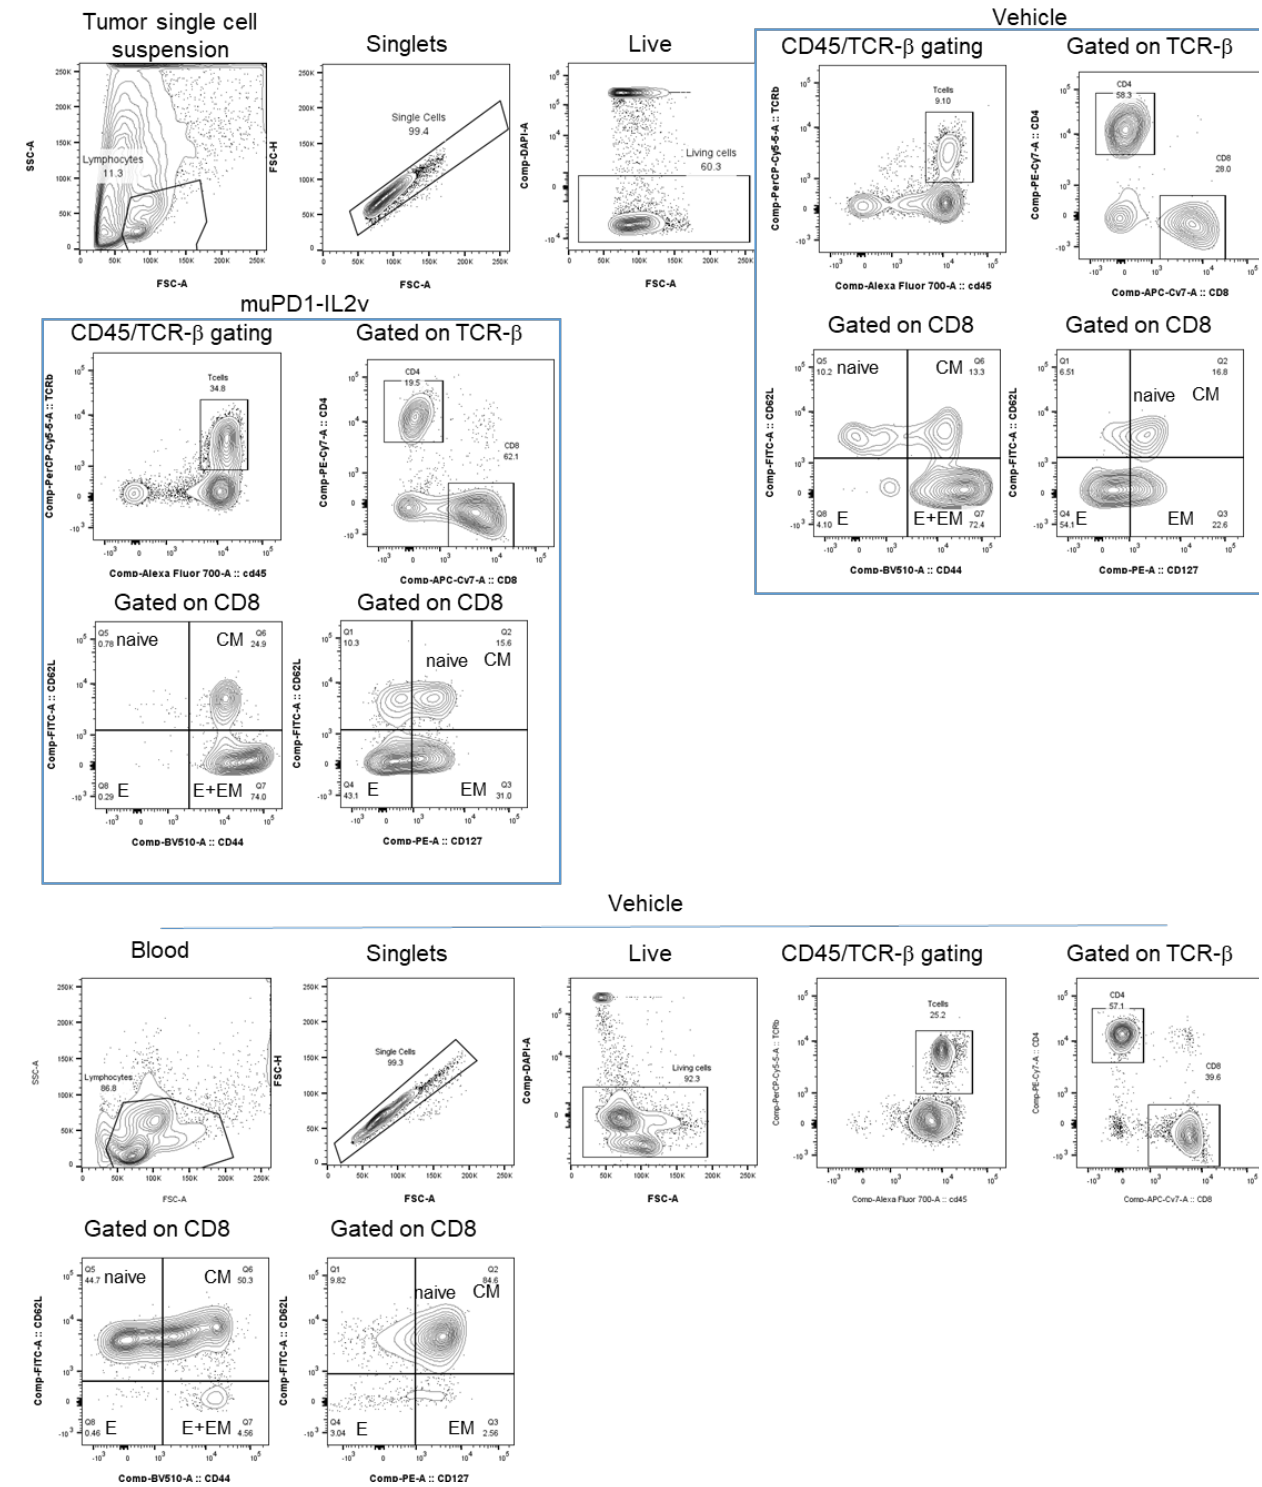

**Supplementary Figure 16. Gating strategy for Fig. 3e and f.** Single cell suspension of tumor and blood from syngeneic C57BL/6J mice with Panc02 tumors were gated on lymphocytes, singlets, live<sup>+</sup>, CD45<sup>+</sup>, TCR- $\beta$ <sup>+</sup>, CD8<sup>+</sup> and CD4<sup>+</sup>, and measured for the frequency of naive, central memory, effector memory and effector.

## T cell analysis on PD-1 and IL-2R $\beta$ frequencies and quantification in tumor and blood

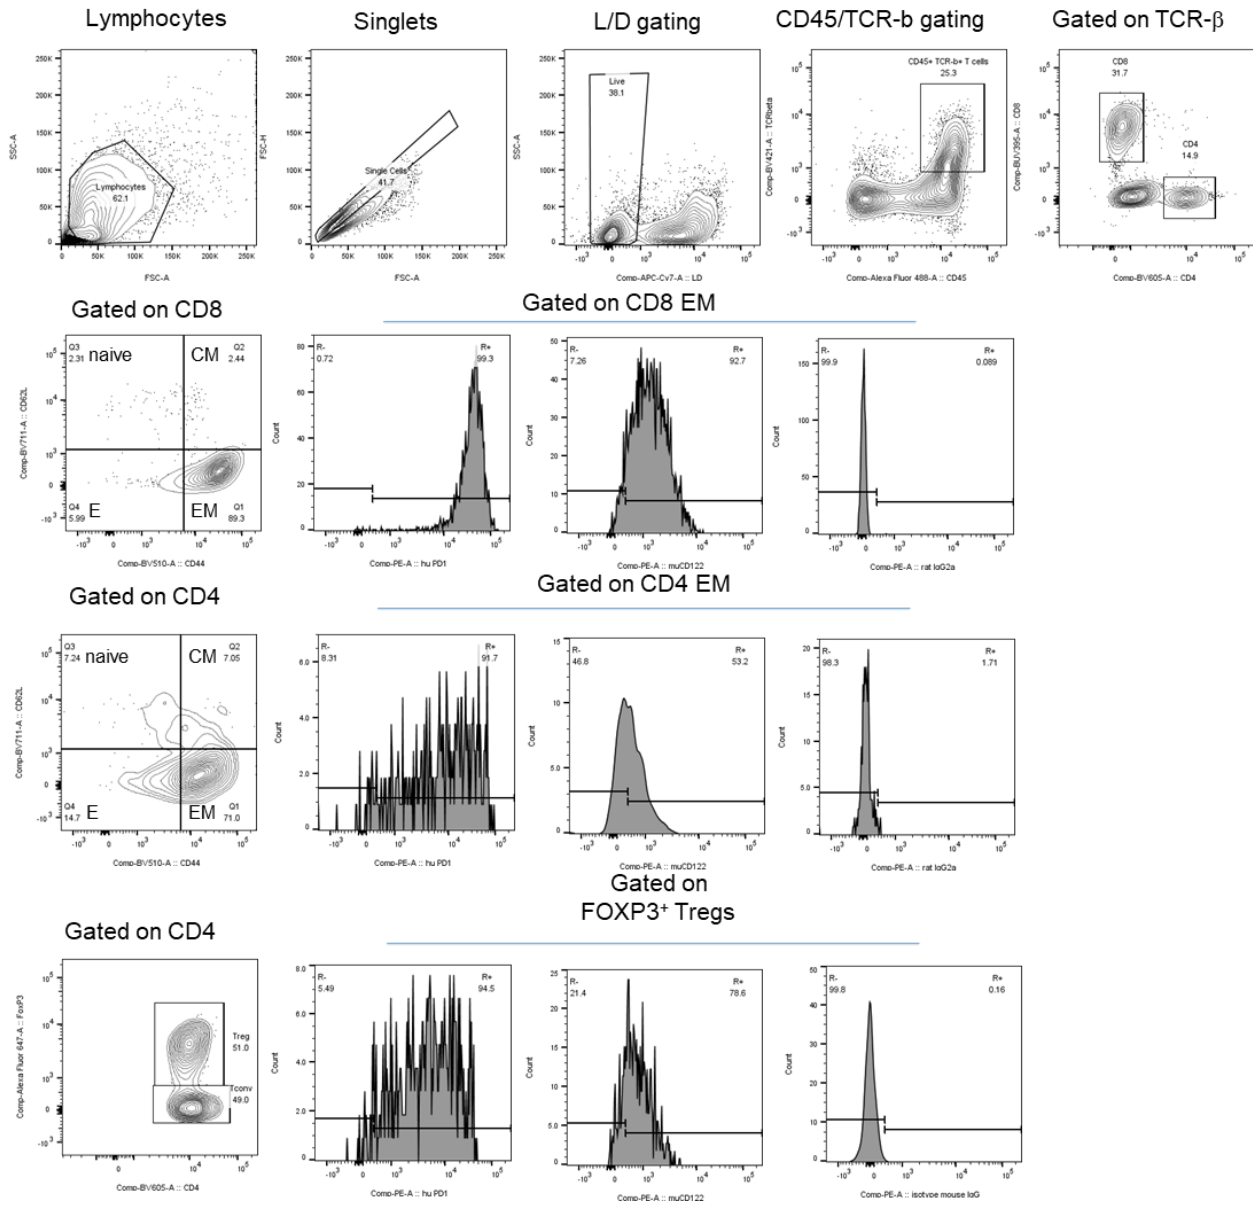

**Supplementary Figure 17. Gating strategy for Fig. 3g and EDF7e and g.** Single cell suspension of tumor and blood from huPD-1 transgenic mice with Panc02 tumors were gated on lymphocytes, singlets, live<sup>+</sup>, CD45<sup>+</sup>, TCR- $\beta$ <sup>+</sup>, either CD8<sup>+</sup> or CD4<sup>+</sup>, and measured for the frequency and density of PD-1<sup>+</sup> and IL-2R $\beta$ <sup>+</sup> on naïve, central memory, effector memory and effector.

**T cell analysis on frequency of PD-1<sup>+</sup>TCF-1<sup>+</sup> stem-like and PD-1<sup>+</sup>TCF-1<sup>-</sup> CD8 TILs expressing Granzyme B and/or TIM-3**

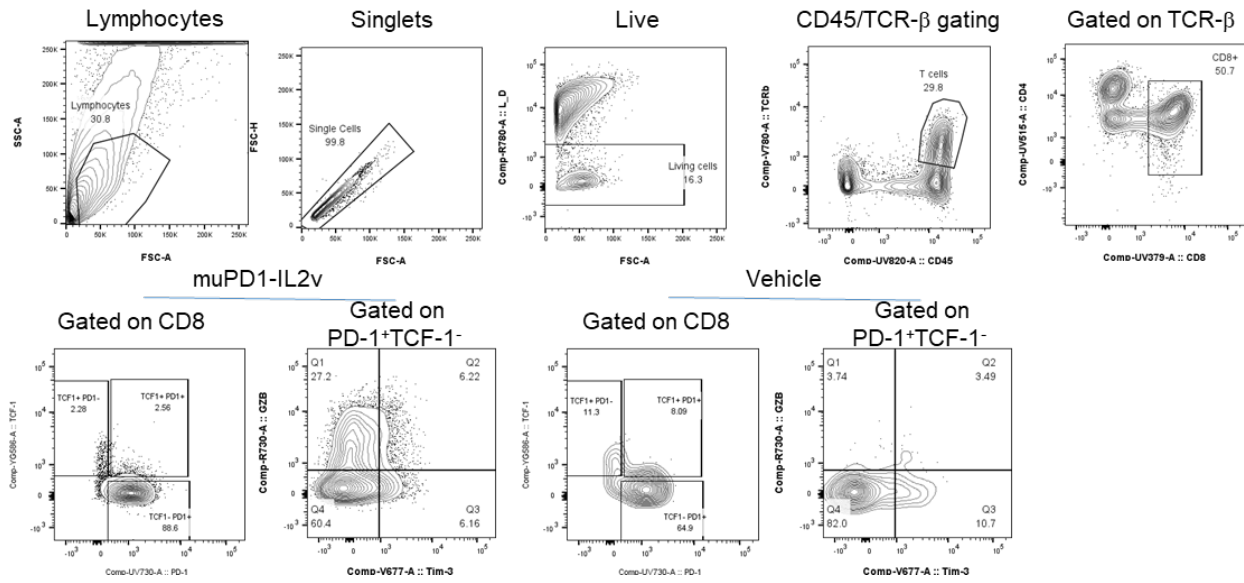

**Supplementary Figure 18. Gating strategy for Fig. 4a-f.** Single cell suspension of tumor from syngeneic C57BL/6J mice with Panc02 tumors were gated on lymphocytes, singlets, live<sup>+</sup>, CD45<sup>+</sup>, TCR-β<sup>+</sup>, CD8<sup>+</sup> and measured for the frequency of PD-1 and TCF-1 expression and of Granzyme B and TIM-3

## Sorting of CD8 TILs

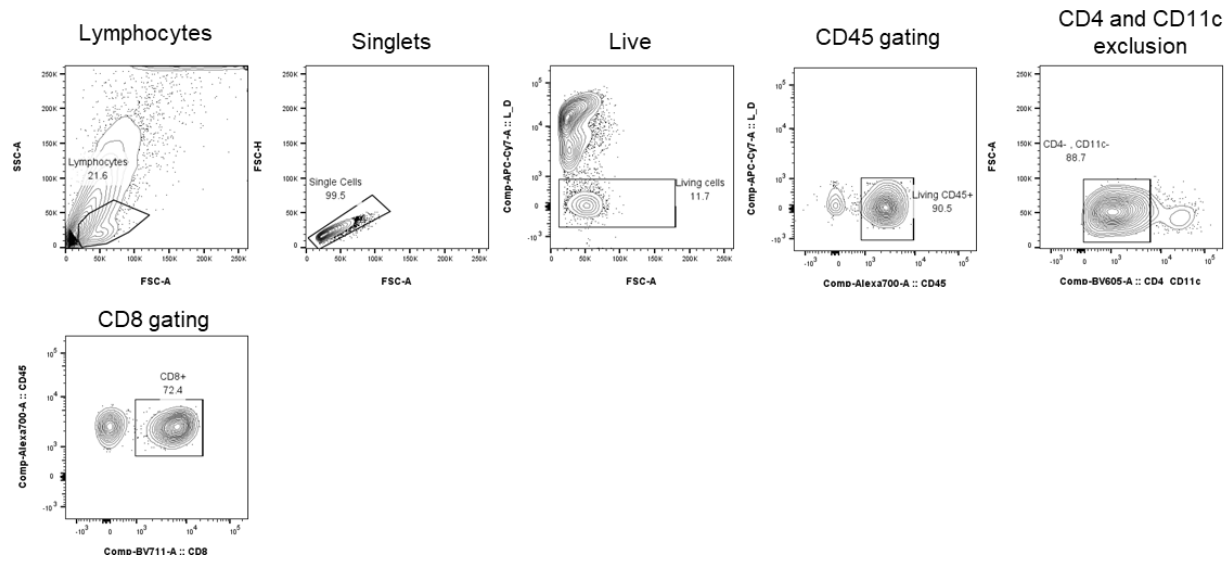

**Supplementary Figure 19. Gating strategy for Fig. 4g-k.** Single cell suspension of tumor from syngeneic C57BL/6J mice with Panc02 tumors were gated on lymphocytes, singlets, live<sup>+</sup>, CD45<sup>+</sup>, TCR- $\beta$ <sup>+</sup>, CD8<sup>+</sup>, CD4<sup>-</sup> and CD11c<sup>-</sup>.



**T cell analysis on frequency of OVA-specific PD-1<sup>+</sup>TCF-1<sup>+</sup> stem-like and PD-1<sup>+</sup>TCF-1<sup>-</sup> CD8<sup>+</sup> TILs expressing Granzyme B and/or TIM-3**

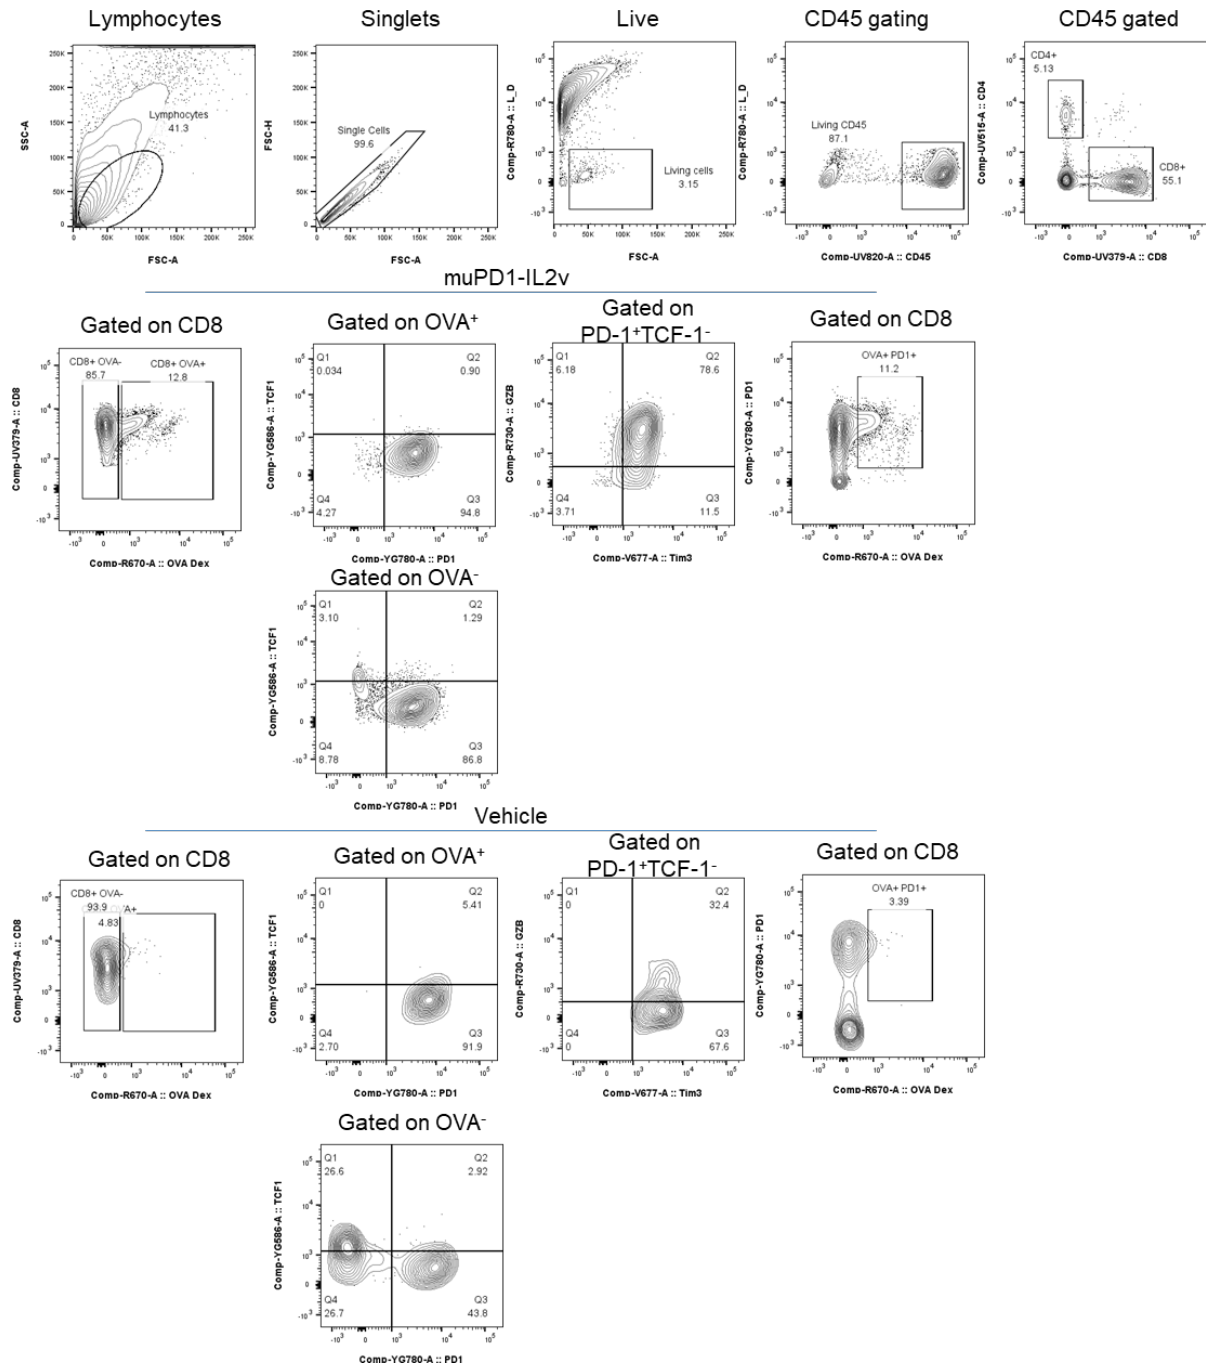

**Supplementary Figure 20. Gating strategy for Fig. 5b-g.** Single cell suspension of tumor from syngeneic C57BL/6J mice with Panc02 tumors were gated on lymphocytes, singlets, live<sup>+</sup>, CD45<sup>+</sup>, TCR-β<sup>+</sup>, CD8<sup>+</sup>, OVA<sup>+</sup> and OVA<sup>-</sup>, and measured for the frequency of PD-1 and TCF-1 expression and of Granzyme B and TIM-3.

## T cell analysis on restimulated CD8 TILs with OVA peptide (SIINFEKL)

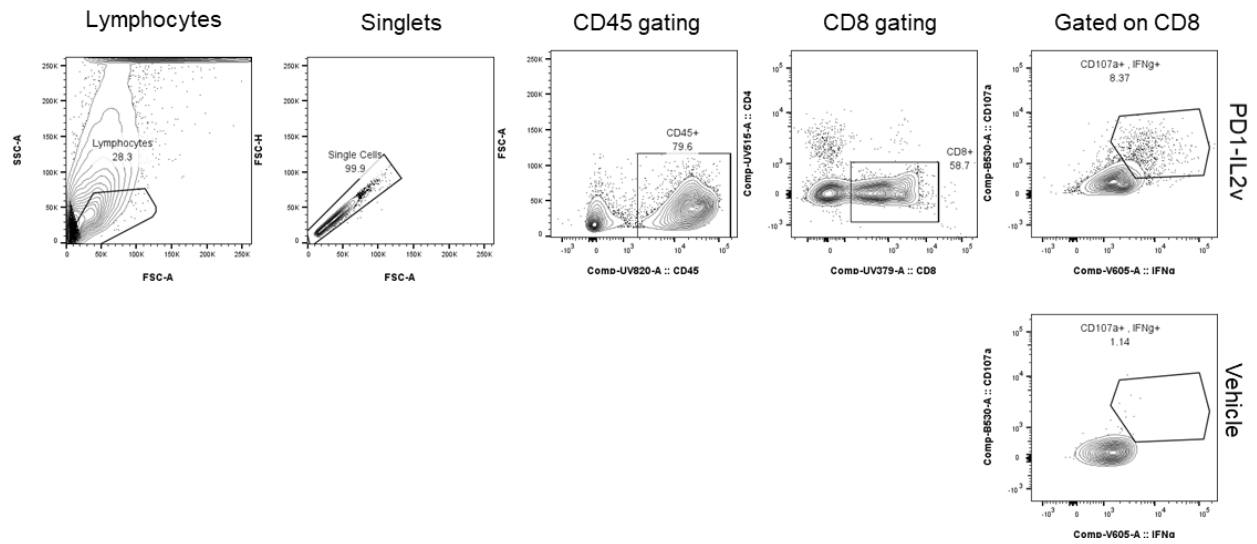

**Supplementary Figure 21. Gating strategy for Fig. 5h.** Single cell suspension of tumor from syngeneic C57BL/6J mice with Panc02 tumors were gated on lymphocytes, singlets, CD45<sup>+</sup>, CD8<sup>+</sup>, and measured for the frequency of CD107a<sup>+</sup> IFN- $\gamma$ <sup>+</sup>.

## T cell analysis on STAT-5P cis-trans assay with FAP-Superkine-like

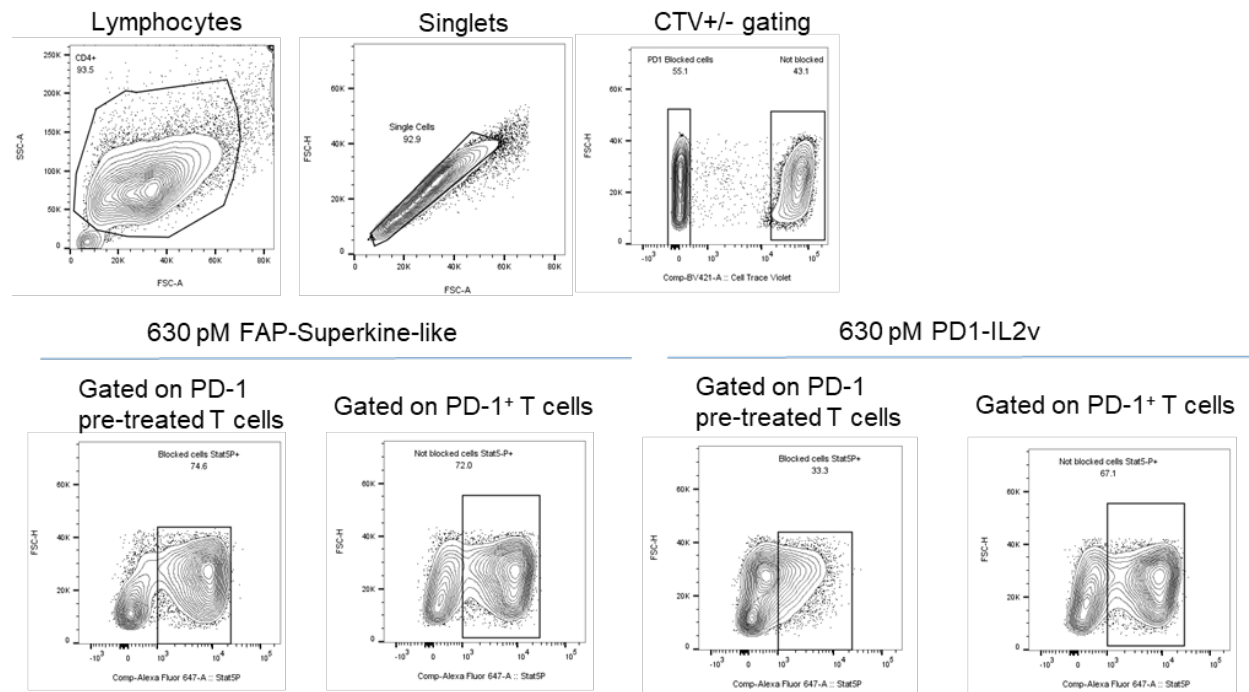

**Supplementary Figure 22. Gating strategy for EDF4b.** Sorted 3 days activated PD-1<sup>+</sup> CD4 T cells from healthy donors were gated on lymphocytes, singlets, positivity for CTV and measured for the frequency of STAT-5P<sup>+</sup> on either PD-1 pre-treated T cells (PD-1 deficient) or PD-1<sup>+</sup> T cells.

## Lymphocyte analysis on preferential binding

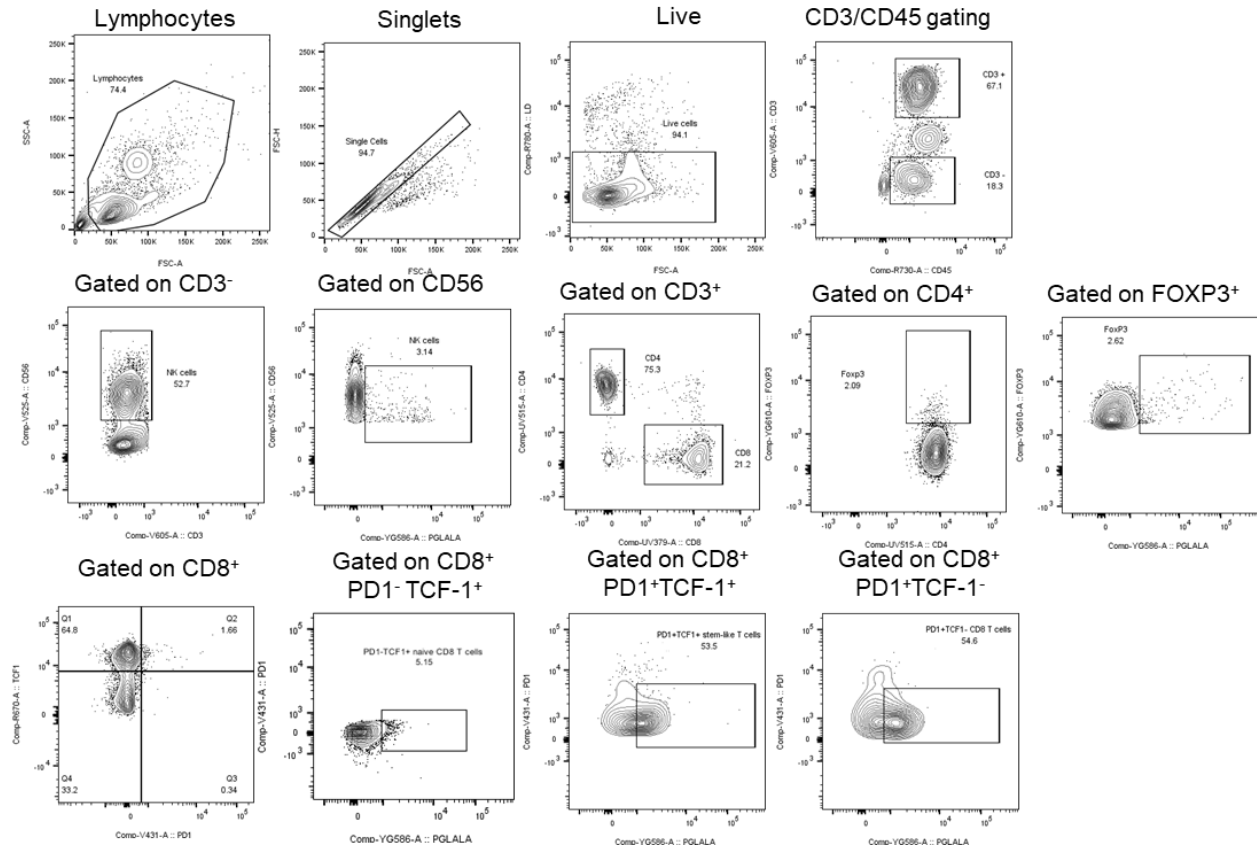

**Supplementary Figure 23. Gating strategy for EDF4c.** Freshly isolated PBMCs from healthy donors were gated on lymphocytes, singlets, live and either CD3<sup>-</sup> CD56<sup>+</sup>, CD4<sup>+</sup> FOXP3<sup>+</sup>, or CD8<sup>+</sup> and measured for the co-expression of PD-1 and TCF-1.

## T cell analysis on cytokine secretion by CD8 TILs

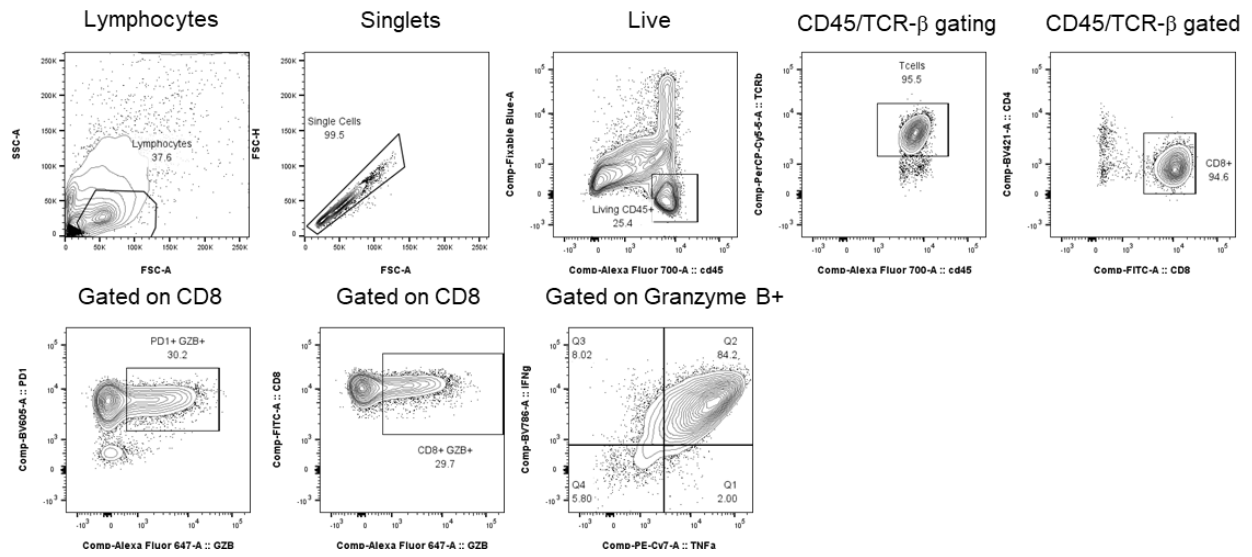

**Supplementary Figure 24. Gating strategy for EDF7a-b.** Single cell suspension of tumor from syngeneic C57BL/6J mice with Panc02 tumors were gated on lymphocytes, singlets, live, CD45<sup>+</sup>, TCR-β<sup>+</sup>, CD8<sup>+</sup> and measured for the frequency of PD-1<sup>+</sup> Granzyme B<sup>+</sup> and IFN-γ<sup>+</sup> TNF-α<sup>+</sup>.

# T cell analysis on binding competition with parental anti-PD-1 Alexa Fluor-647

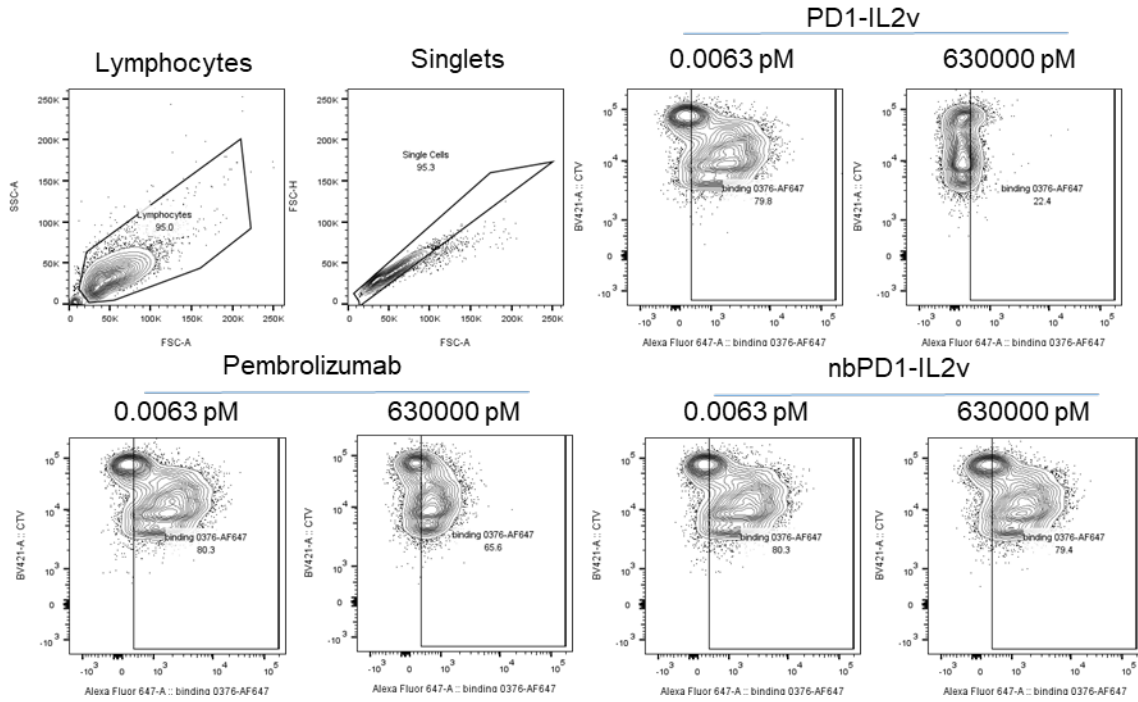

**Supplementary Figure 25. Gating strategy for EDF7i.** Sorted 3 days activated PD-1<sup>+</sup> CD4 T cells from healthy donors were gated on lymphocytes, singlets, CTV<sup>+</sup> and measured binding of parental anti-PD-1 Alexa Fluor-647.

**Supplementary Table 1**

List of antibodies used in the presented study

| Ex-vivo binding on human PBMCs                                       |                      |                  |            |                            |                              |
|----------------------------------------------------------------------|----------------------|------------------|------------|----------------------------|------------------------------|
| Marker                                                               | Fluorophore          | Clone            | #CAT       | Company                    | Dilution/Final Concentration |
| Live/Dead                                                            | APC-Cy7              |                  | 65-0865-14 | eBioscience                | 1:500                        |
| CD45                                                                 | AF700                | HI30             | 56-9459-42 | eBioscience                | 1:100                        |
| CD3                                                                  | BV605                | OKT3             | 317322     | Biolegend                  | 1:100                        |
| CD4                                                                  | BUV496               | OKT4             | 612936     | BD Biosciences             | 1:100                        |
| CD8                                                                  | BUV395               | RPA-T8           | 563795     | BD Biosciences             | 1:100                        |
| CD366 (TIM-3)                                                        | BV711                | F38-2E2          | 345024     | Biolegend                  | 1:20                         |
| LAG3 (CD223)                                                         | PerCP-Cy5.5          | 3DS223H          | 46-2239-42 | eBioscience                | 1:20                         |
| TIGIT                                                                | BV786                | 741182           | 747838     | BD Biosciences             | 1:20                         |
| CD218a (IL-18Ra)                                                     | FITC                 | H44              | 313810     | Biolegend                  | 1:100                        |
| CD56                                                                 | BV5480               | NCAM16.2         | 566124     | BD Biosciences             | 1:20                         |
| TCR g/d                                                              | PE-Cy7               | B1               | 331222     | Biolegend                  | 1:50                         |
| PG-LALA                                                              | PE                   | NA               |            | Roche                      | 1:650<br>(2.5ug/ml)          |
| TCF-1 /TCF-7                                                         | AF647                | C63D9            | 6709S      | Cell Signaling Technologie | 1:100                        |
| PD-1 IC                                                              |                      | D4W2J            | 86163S     | Cell Signaling Technologie | 1:100                        |
| Goat anti-Rabbit secondary ab                                        | BV421                | Polyclonal       | 565014     | BD                         | 1:100                        |
| FOXP3                                                                | PE-CF594             | 206D             | 320126     | Biolegend                  | 1:50                         |
| In-vitro experiment on human CD4 T cells (incl. T con and Tregs)     |                      |                  |            |                            |                              |
| Marker                                                               | Fluorophore          | Clone            | #CAT       | Company                    | Dilution/Final Concentration |
| Stat5 (pY694)                                                        | AF647                | 47/Stat5 (pY694) | 562076     | BD                         | 1:20                         |
| PD-1                                                                 | PE                   | EH12.2H7         | 329906     | Biolegend                  | 2.5ug/ml                     |
| IL2Rb                                                                | PE                   | TU27             | 339006     | Biolegend                  | 2.5ug/ml                     |
| isotype                                                              | PE                   | MOPC-21          | 400112     | Biolegend                  | 2.5ug/ml                     |
| Parental PD-1                                                        | AF647                | 0376             | NA         | Roche                      | 1ug/ml                       |
| PD1-IL2v                                                             | AF647                | 0376-IL2v fused  | NA         | Roche                      | 1ug/ml                       |
| CD4                                                                  | AF700                | RPA-T4           | 56-0049-42 | eBioscience                | 1:50                         |
| live/dead                                                            | Aqua Dead Cell Stain | -                | L34966     | Invitrogen                 | 1:1000                       |
| Granzyme B                                                           | AF647                | GB11             | 561999     | BD Biosciences             | 1:100                        |
| GM-CSF                                                               | PE                   | BVD2-21C11       | 502306     | Biolegend                  | 1:100                        |
| IFN $\gamma$                                                         | PE-Cy7               | 4S.B3            | 25-7319-82 | eBioscience                | 1:200                        |
| Ex-vivo receptor quantification on mouse TILs and T cells from blood |                      |                  |            |                            |                              |

| Marker                                         | Fluorophore    | Clone    | #CAT       | Company                   | Dilution/Final Concentration |
|------------------------------------------------|----------------|----------|------------|---------------------------|------------------------------|
| PD-1                                           | PE             | 29F.1A12 | 135206     | Biolegend                 | 2.5ug/ml                     |
| PD-1                                           | PE             | EH12.2H7 | 329906     | Biolegend                 | 2.5ug/ml                     |
| IL2Rb                                          | PE             | 5H4      | 105906     | Biolegend                 | 2.5ug/ml                     |
| TCRb                                           | BV421          | H57-597  | 109230     | Biolegend                 | 1:200                        |
| CD8                                            | BV395          | 53-6.7   | 565968     | BD Biosciences            | 1:200                        |
| CD4                                            | AF488          | GK1.5    | 100406     | Biolegend                 | 1:100                        |
| CD62L                                          | BV711          | MEL-14   | 104445     | Biolegend                 | 1:200                        |
| CD44                                           | BV480          | IM7      | 566116     | BD Biosciences            | 1:200                        |
| FOXP3                                          | AF647          | 150D     | 320014     | Biolegend                 | 1:100                        |
| Antibodies used for the LCMV-chronic infection |                |          |            |                           |                              |
| Marker                                         | Fluorophore    | Clone    | #CAT       | Company                   | Dilution                     |
| CD4                                            | BUV563         | RM4-5    | 741217     | BD Biosciences            | 1:500                        |
| CD4                                            | FITC           | RM4-5    | 553046     | BD Biosciences            | 1:500                        |
| CD4                                            | V500           | RM4-5    | 560782     | Biolegend                 | 1:500                        |
| CD4                                            | BV605          | RM4-5    | 100548     | Biolegend                 | 1:500                        |
| CD4                                            | BV711          | RM4-5    | 100557     | Biolegend                 | 1:500                        |
| CD4                                            | PE-Cy7         | RM4-5    | 25-0042-82 | Thermo Fischer Scientific | 1:500                        |
| CD4                                            | APC-eFluor 780 | RM4-5    | 47-0042-82 | Thermo Fischer Scientific | 1:500                        |
| CD8a                                           | BUV496         | 53-6.7   | 563786     | BD Biosciences            | 1:100                        |
| CD8a                                           | BV421          | 53-6.7   | 100753     | Biolegend                 | 1:150                        |
| CD8a                                           | BV605          | 53-6.7   | 100744     | Biolegend                 | 1:100                        |
| CD8a                                           | PerCP          | 53-6.7   | 553036     | BD Biosciences            | 1:100                        |
| CD19                                           | BUV563         | 1D3      | 749028     | BD Biosciences            | 1:150                        |
| CD19                                           | BV510          | 1D3      | 115546     | Biolegend                 | 1:150                        |
| CD19                                           | BV605          | 1D3      | 115540     | Biolegend                 | 1:150                        |
| CD19                                           | PE-Cy7         | 1D3      | 25-0193-82 | Thermo Fischer Scientific | 1:150                        |
| CD19                                           | APC-eFluor 780 | 1D3      | 47-0193-82 | Thermo Fischer Scientific | 1:150                        |
| CD44                                           | BUV805         | IM7      | 741921     | BD Biosciences            | 1:500                        |
| CD44                                           | FITC           | IM7      | 561859     | BD Biosciences            | 1:500                        |
| CD44                                           | AF700          | IM7      | 56-0441-82 | Thermo Fischer Scientific | 1:100                        |
| CD45.2                                         | APC            | 104      | 109814     | Biolegend                 | 1:100                        |
| CD127                                          | BUV737         | SB/199   | 612841     | BD Biosciences            | 1:100                        |
| CD127                                          | PE             | A7R34    | 12-1271-83 | Thermo Fischer Scientific | 1:100                        |
| CD218a                                         | PE             | P3TUNYA  | 12-5183-82 | Thermo Fischer Scientific | 1:100                        |
| CD218a                                         | PE-Cy7         | P3TUNYA  | 25-5183-82 | Thermo Fischer Scientific | 1:100                        |



|                                                                |               |           |            |                           |                             |
|----------------------------------------------------------------|---------------|-----------|------------|---------------------------|-----------------------------|
| CXCR3                                                          | PE-Cy7        | CXCR3-173 | 25-1831-82 | Thermo Fischer Scientific | 1:100                       |
| CXCR5                                                          | BV421         | L138D7    | 145512     | Biologend                 | 1:50                        |
| CX3CR1                                                         | BV785         | SA011F11  | 149031     | Biologend                 | 1:500                       |
| Foxp3                                                          | PE-Cy7        | FJK-16s   | 25-5773-82 | Thermo Fischer Scientific | 1:250                       |
| IL-2                                                           | PE            | JES6-5H4  | 554428     | BD Biosciences            | 1:100                       |
| IFN- $\gamma$                                                  | BV421         | XMG1.2    | 505830     | Biologend                 | 1:100                       |
| IFN- $\gamma$                                                  | APC           | XMG1.2    | 554413     | BD Biosciences            | 1:100                       |
| PD-1                                                           | PE            | RMP1-30   | 109104     | Biologend                 | 1:100                       |
| PD-1                                                           | APC           | RMP1-30   | 109112     | Biologend                 | 1:100                       |
| TCF-1                                                          | PE            | S33-966   | 564217     | BD Biosciences            | 1:100                       |
| Tim-3                                                          | BUV395        | 5D12      | 747620     | BD Biosciences            | 1:100                       |
| Tim-3                                                          | AF488         | 215008    | FAB1529G   | R&D systems               | 1:20                        |
| TNF-a                                                          | BV421         | MP6-XT22  | 506328     | Biologend                 | 1:100                       |
| TNF-a                                                          | PE            | MP6-XT22  | 554419     | BD Biosciences            | 1:100                       |
|                                                                |               |           |            |                           |                             |
| Name                                                           |               | Clone     | #Catalogue |                           |                             |
| anti-mouse PD-L1 with DAPG mutation                            |               | NA        | NA         | Roche                     | 200 $\mu$ g/mouse/injection |
| mouse IgG1 isotype control                                     |               | MOPC-21   | BE0083     | BioXcell                  | 200 $\mu$ g/mouse/injection |
| anti-mouse CD4                                                 |               | GK1.5     | BE0003-1   | BioXcell                  | 300 $\mu$ g/mouse/injection |
|                                                                |               |           |            |                           |                             |
| Antibodies used for TILs characterization in mouse tumor-model |               |           |            |                           |                             |
| Marker                                                         | Fluorochrome  | clone     | Cat number | Provider                  | Dilution                    |
| Fixable Viability Dye                                          | eFluor™ 455UV |           | 65-0868-14 |                           | 1:500                       |
| CD45                                                           | AF700         | 30-F11    | 103128     | Biologend                 | 1:300                       |
| TCRb                                                           | PercP-Cy5.5   | H57-597   | 109228     | Biologend                 | 1:200                       |
| CD8                                                            | APC-Cy7       | 53-6.7    | 100714     | Biologend                 | 1:200                       |
| CD4                                                            | PE-Cy7        | GK1.5     | 100422     | Biologend                 | 1:200                       |
| CD62L                                                          | FITC          | MEL-14    | 104406     | Biologend                 | 1:200                       |
| CD127                                                          | PE            | A7R34     | 135010     | Biologend                 | 1:100                       |
| TCRb                                                           | PerCP-Cy5.5   | H57-597   | 109228     | Biologend                 | 1:200                       |
| CD4                                                            | BV421         | GK1.5     | 100438     | Biologend                 | 1:200                       |
| Granzyme B                                                     | AF647         | GB11      | 515406     | Biologend                 | 1:100                       |
| IFN-g                                                          | BV786         | XMG1.2    | 505838     | Biologend                 | 1:100                       |
| TNFa                                                           | PE-Cy7        | MP6-XT22  | 506306     | Biologend                 | 1:100                       |
| FoxP3                                                          | BV421         | MF-14     | 126419     | Biologend                 | 1:100                       |
| CD39                                                           | AF647         | Duha59    | 143808     | Biologend                 | 1:200                       |

|                                        |                 |          |                       |                              |                             |
|----------------------------------------|-----------------|----------|-----------------------|------------------------------|-----------------------------|
| Granzyme B                             | AF700           | QA16A02  | 372222                | Biolegend                    | 1:100                       |
| ki67                                   | PE-Cy7          | 16A8     | 652426                | Biolegend                    | 1:300                       |
| PD1                                    | PE-Cy7          | RMP1-30  | 109110                | Biolegend                    | 1:200                       |
| CD25                                   | BV711           | RMT3-23  | 102049                | Biolegend                    | 1:200                       |
| TIGIT                                  | PE-Dazzle594    | 1G9      | 142110                | Biolegend                    | 1:100                       |
| IFN-g                                  | BV605           | XMG1.2   | 505840                | Biolegend                    | 1:100                       |
| TNFa                                   | BV421           | MP6-XT22 | 506328                | Biolegend                    | 1:100                       |
| CD107a                                 | AF488           | 1D4B     | 121608                | Biolegend                    | 1:100                       |
| CD44                                   | BV510           | IM7      | 563114                | BD Biosciences               | 1:200                       |
| CD45                                   | BUV805          | 30-F11   | BDB748370             | BD Biosciences               | 1:100                       |
| TCRb                                   | BV786           | H57-597  | 742484                | BD Biosciences               | 1:100                       |
| CD4                                    | BUV496          | RM4-5    | 612952                | BD Biosciences               | 1:100                       |
| CD8                                    | BUV395          | 53-6.7   | 563786                | BD Biosciences               | 1:100                       |
| PD-1                                   | BUV737          | RMP1-30  | 749306                | BD Biosciences               | 1:100                       |
| CD25                                   | PE-CF594        | PC61     | 562694                | BD Biosciences               | 1:100                       |
| Tim3                                   | BV650           | 5D12     | 747623                | BD Biosciences               | 1:100                       |
| TCF1                                   | PE              | S33-966  | 564217                | BD Biosciences               | 1:100                       |
| LAG3                                   | BV650           | C9B7W    | 740560                | BD Biosciences               | 1:100                       |
| SLAMF6                                 | BV510           | 13G3     | 745073                | BD Biosciences               | 1:50                        |
| CD218a                                 | FITC            | REA947   | 130-115-703           | Miltenyi                     | 1:50                        |
| OVA-dextramer H-2 Kb ((SIINFEKL)       | APC             |          | JD2163                | Immudex                      | 1:100                       |
| Rat anti-mouse CD8 $\alpha$ InVivoPlus |                 | 2.43     | BP0061                | BioXcell                     | 100 $\mu$ g/mouse/injection |
| Feature barcoding                      |                 |          |                       |                              |                             |
| Marker                                 | Oligo Tag       | Clone    | Source                | Concentration (1 $\mu$ g/ml) |                             |
| CD28                                   | ATTAAGAGCGTGTTG | 37.51    | TotalSeq-C, BioLegend | 1                            |                             |
| CD44                                   | TGGCTTCAGGTCCTA | IM7      | TotalSeq-C, BioLegend | 1                            |                             |
| CD62L (L-selectin)                     | TGGGCCTAAGTCATC | MEL-14   | TotalSeq-C, BioLegend | 1                            |                             |
| CD39                                   | GCGTATTTAACCCGT | Duha59   | TotalSeq-C, BioLegend | 1                            |                             |
| CD279 (PD-1)                           | GAAAGTCAAAGCACT | RMP1-30  | TotalSeq-C, BioLegend | 1                            |                             |
| CD366 (Tim-3)                          | ATTGGCACTCAGATG | RMT3-23  | TotalSeq-C, BioLegend | 1                            |                             |

|                                                          |                 |                 |                          |                            |          |
|----------------------------------------------------------|-----------------|-----------------|--------------------------|----------------------------|----------|
| CD223 (LAG-3)                                            | ATTCCGTCCTAAGG  | C9B7W           | TotalSeq-C,<br>BioLegend | 1                          |          |
| CD183 (CXCR3)                                            | GTTACGCCGTGTTA  | CXCR3-173       | TotalSeq-C,<br>BioLegend | 1                          |          |
| CD185 (CXCR5)                                            | ACGTAGTCACCTAGT | L138D7          | TotalSeq-C,<br>BioLegend | 1                          |          |
| CD127 (IL-7R $\alpha$ )                                  | GTGTGAGGCACTCTT | A7R34           | TotalSeq-C,<br>BioLegend | 1                          |          |
| TIGIT (Vstm3)                                            | GAAAGTCGCCAACAG | 1G9             | TotalSeq-C,<br>BioLegend | 1                          |          |
| CD25                                                     | ACCATGAGACACAGT | PC61            | TotalSeq-C,<br>BioLegend | 1                          |          |
| Ly108 (SLAM-F6)                                          | CGATTCTTTGCGAGT | 330-AJ          | TotalSeq-C,<br>BioLegend | 1                          |          |
| CD137 (4-1BB)                                            | TCCCTGTATAGATGA | 17B5            | TotalSeq-C,<br>BioLegend | 1                          |          |
| IL-21R                                                   | GATTCCGACAGTAGA | 4A9             | TotalSeq-C,<br>BioLegend | 1                          |          |
| Histology                                                |                 |                 |                          |                            |          |
| Marker                                                   | Fluorochrome    | clone           | Cat number               | Provider                   | Dilution |
| CD3                                                      |                 | SP7             | RMAB005                  | Diagnostic Biosystems      | 1:100    |
| CD8                                                      |                 | 4SM15           | 14-0808-82               | eBioscience                | 1:300    |
| PD-1                                                     |                 | Polyclonal      | AF1021                   | R&D Systems                | 1:250    |
| Granzyme B                                               |                 | Polyclonal      | Ab4059                   | Abcam                      | 1:250    |
|                                                          |                 |                 |                          |                            |          |
| Confocal Imaging                                         |                 |                 |                          |                            |          |
| Marker                                                   | Fluorochrome    | clone           | Cat number               | Provider                   | Dilution |
| PD-1 IC                                                  |                 | D4W2J           | 86163S                   | Cell Signaling Technologie | 1:100    |
| Goat anti-rabbit IgG (H+L), F(ab') <sub>2</sub> Fragment | AF488           | Polyclonal      | 4412S                    | Cell Signaling Technologie | 1:1000   |
| Parental PD-1                                            | Pure            | 0376            | NA                       | Roche                      | 10ug/ml  |
| PD1-IL2v                                                 | AF647           | 0376-IL2v fused | NA                       | Roche                      | 1ug/ml   |
| FAP-IL2v                                                 | AF647           | 4B9-IL2v fused  | NA                       | Roche                      | 1ug/ml   |
| Cell sorting                                             |                 |                 |                          |                            |          |
| Marker                                                   | Fluorochrome    | clone           | Cat number               | Provider                   | Dilution |
| CD45                                                     | AF700           | 30-F11          | 103128                   | Biolegend                  | 1:100    |

|           |                     |        |            |              |       |
|-----------|---------------------|--------|------------|--------------|-------|
| CD8       | BV711               | 53-6.7 | 100748     | Biolegend    | 1:100 |
| CD4       | BV605 (Bin channel) | GK1.5  | 100451     | Biolegend    | 1:100 |
| CD11c     | BV605 (Bin channel) | N418   | 117334     | Biolegend    | 1:100 |
| Live/Dead | APC-Cy7             |        | 65-0865-14 | eBiosciences | 1:500 |

## **Supplementary Notes**

### **Acknowledgements**

For generating RNA-seq data from chronic infection experiments, we thank Emory University School of Medicine Flow Cytometry Core (K. Fife and R. Karaffa), Yerkes NPRC Genomics Core (K. Pellegrini and S. Bosinger, NIH P51OD011132 and NIH S10 OD026799), and Emory Integrated Genomics Core (EIGC) Shared Resource of Winship Cancer Institute of Emory University and NIH/NCI (L. Griffiths, 2P30CA138292-04).
